# Supplementary material for: Prevalence and Antimicrobial Resistance of Paeniclostridium sordellii in Hospital Settings
Source: MDPI journal article supplement (doi:10.3390/antibiotics11010038), 2021-12-29
Supplement: s1 [file s1]

**Table S1.** List of primers designed and validated in this study.

|                         | Primer and<br>Probe Name | Primer and Probes Sequence | Length (bp) | Amplicon<br>Size (bp) | Reference  |
|-------------------------|--------------------------|----------------------------|-------------|-----------------------|------------|
| <b>Standard<br/>PCR</b> | <i>tcsL</i> -F           | TGCTCCTGCTGGTACACTTG       | 20          | 1221                  | This study |
|                         | <i>tcsL</i> -R           | TCCCCCTCAAAATTCTCATC       | 20          |                       |            |
|                         | <i>tcsH</i> -F           | TGGAGTTTTGATCAAGCAAGCG     | 22          | 1430                  | This study |
|                         | <i>tcsH</i> -R           | AGTTGGGCATACAGTTGAACCT     | 22          |                       |            |
