# Supplementary material for: Prevalence and Antimicrobial Resistance of Paeniclostridium sordellii in Hospital Settings
Source: MDPI journal article supplement (doi:10.3390/antibiotics11010038), 2021-12-29
Supplement: s1 [file s1]

**Table S2.** List of the bacterial strains tested for the specificity of the designed PCR assay.

| Type of Bacteria             | Bacterial Species                   | Number of Strains | Origin    | PCR         |             |
|------------------------------|-------------------------------------|-------------------|-----------|-------------|-------------|
|                              |                                     |                   |           | <i>tcsL</i> | <i>tcsH</i> |
| Gram-positive bacteria       | <i>Staphylococcus aureus</i>        | 1                 | Marseille | -           | -           |
|                              | <i>Staphylococcus epidermidis</i>   | 1                 | Marseille | -           | -           |
|                              | <i>Streptococcus agalactiae</i>     | 1                 | Marseille | -           | -           |
|                              | <i>Streptococcus pneumoniae</i>     | 1                 | Marseille | -           | -           |
|                              | <i>Staphylococcus haemolyticus</i>  | 1                 | Marseille | -           | -           |
|                              | <i>Staphylococcus capitis</i>       | 1                 | Marseille | -           | -           |
|                              | <i>Staphylococcus lugdunensis</i>   | 1                 | Marseille | -           | -           |
|                              | <i>Streptococcus mitis</i>          | 1                 | Marseille | -           | -           |
|                              | <i>Staphylococcus warneri</i>       | 1                 | Marseille | -           | -           |
|                              | <i>Corynebacterium striatum</i>     | 1                 | Marseille | -           | -           |
|                              | <i>Staphylococcus saprophyticus</i> | 1                 | Marseille | -           | -           |
|                              | <i>Corynebacterium jeikeium</i>     | 1                 | Marseille | -           | -           |
|                              | <i>Staphylococcus simulans</i>      | 1                 | Marseille | -           | -           |
|                              | <i>Staphylococcus pasteurii</i>     | 1                 | Marseille | -           | -           |
|                              | <i>Corynebacterium amycolatum</i>   | 1                 | Marseille | -           | -           |
|                              | <i>Bacillus cereus</i>              | 1                 | Marseille | -           | -           |
|                              | <i>Staphylococcus cohnii</i>        | 1                 | Marseille | -           | -           |
|                              | <i>Streptococcus salivarius</i>     | 1                 | Marseille | -           | -           |
|                              | <i>Streptococcus equinus</i>        | 1                 | Marseille | -           | -           |
|                              | <i>Corynebacterium propinquum</i>   | 1                 | Marseille | -           | -           |
|                              | <i>Micrococcus luteus</i>           | 1                 | Marseille | -           | -           |
|                              | <i>Streptococcus dysgalactiae</i>   | 1                 | Marseille | -           | -           |
|                              | <i>Staphylococcus hominis</i>       | 1                 | Marseille | -           | -           |
| <b>Total of strains = 23</b> |                                     |                   |           |             |             |
| Gram-negative bacteria       | <i>Proteus mirabilis</i>            | 1                 | Marseille | -           | -           |
|                              | <i>Citrobacter freundii</i>         | 1                 | Marseille | -           | -           |
|                              | <i>Achromobacter xylosoxidans</i>   | 1                 | Marseille | -           | -           |
|                              | <i>Enterobacter cloacae</i>         | 1                 | Marseille | -           | -           |
|                              | <i>Bacteroides fragilis</i>         | 1                 | Marseille | -           | -           |
|                              | <i>Moraxella catarrhalis</i>        | 1                 | Marseille | -           | -           |
|                              | <i>Proteus vulgaris</i>             | 1                 | Marseille | -           | -           |
|                              | <i>Providencia stuartii</i>         | 1                 | Marseille | -           | -           |
|                              | <i>Haemophilus parainfluenzae</i>   | 1                 | Marseille | -           | -           |
|                              | <i>Klebsiella pneumonia</i>         | 1                 | Marseille | -           | -           |
|                              | <i>Pseudomonas aeruginosa</i>       | 1                 | Marseille | -           | -           |
|                              | <i>Enterobacter kobei</i>           | 1                 | Marseille | -           | -           |
|                              | <i>Enterobacter asburiae</i>        | 1                 | Marseille | -           | -           |
|                              | <i>Hafnia alvei</i>                 | 1                 | Marseille | -           | -           |
|                              | <i>Raoultella ornithinolytica</i>   | 1                 | Marseille | -           | -           |
|                              | <i>Citrobacter braakii</i>          | 1                 | Marseille | -           | -           |
|                              | <i>Escherichia coli</i>             | 1                 | Marseille | -           | -           |
|                              | <i>Pasteurella multocida</i>        | 1                 | Marseille | -           | -           |
|                              | <i>Stenotrophomonas maltophilia</i> | 1                 | Marseille | -           | -           |
|                              | <i>Morganella morganii</i>          | 1                 | Marseille | -           | -           |
|                              | <i>Citrobacter koseri</i>           | 1                 | Marseille | -           | -           |
|                              | <i>Enterobacter aerogenes</i>       | 1                 | Marseille | -           | -           |
|                              | <i>Haemophilus influenzae</i>       | 1                 | Marseille | -           | -           |

|                                                     |                                                 |    |           |   |   |
|-----------------------------------------------------|-------------------------------------------------|----|-----------|---|---|
|                                                     | <i>Klebsiella oxytoca</i>                       | 1  | Marseille | - | - |
|                                                     | <i>Acinetobacter baumannii</i>                  | 2  | Marseille | - | - |
| <b>Total of strains = 26</b>                        |                                                 |    |           |   |   |
| <b><i>Clostridium</i> spp. from CSUR collection</b> | <i>Clostridium aerotolerans</i>                 | 1  | CSUR      | - | - |
|                                                     | <i>Clostridium aldenense</i>                    | 1  | CSUR      | - | - |
|                                                     | <i>Clostridium baratii</i>                      | 1  | CSUR      | - | - |
|                                                     | <i>Clostridium bifermentans</i>                 | 1  | CSUR      | - | - |
|                                                     | <i>Clostridium butyricum</i>                    | 4  | CSUR      | - | - |
|                                                     | <i>Clostridium cadaveris</i>                    | 1  | CSUR      | - | - |
|                                                     | <i>Clostridium clostridioforme</i>              | 1  | CSUR      | - | - |
|                                                     | <i>Clostridium difficile</i> (TcdA)             | 12 | CSUR      | - | - |
|                                                     | <i>Clostridium difficile</i> (TcdB)             | 10 | CSUR      | - | - |
|                                                     | <i>Clostridium difficile</i> (TcdA +TcdB)       | 30 | CSUR      | - | - |
|                                                     | <i>Clostridium difficile</i>                    | 45 | CSUR      | - | - |
|                                                     | <i>Clostridium disporicum</i>                   | 1  | CSUR      | - | - |
|                                                     | <i>Clostridium fallax</i>                       | 1  | CSUR      | - | - |
|                                                     | <i>Clostridium ghonii</i>                       | 1  | CSUR      | - | - |
|                                                     | <i>Clostridium histolyticum</i>                 | 1  | CSUR      | - | - |
|                                                     | <i>Clostridium innocuum</i>                     | 1  | CSUR      | - | - |
|                                                     | <i>Clostridium neonatale</i>                    | 1  | CSUR      | - | - |
|                                                     | <i>Clostridium paraputrificum</i>               | 1  | CSUR      | - | - |
|                                                     | <i>Clostridium perfringens</i>                  | 4  | CSUR      | - | - |
|                                                     | <i>Clostridium ramosum</i>                      | 1  | CSUR      | - | - |
|                                                     | <i>Clostridium saudii</i>                       | 1  | CSUR      | - | - |
|                                                     | <i>Clostridium septicum</i>                     | 1  | CSUR      | - | - |
|                                                     | <i>Clostridium sordellii</i>                    | 7  | CSUR      | - | - |
|                                                     | <i>Clostridium sphenoides</i>                   | 1  | CSUR      | - | - |
|                                                     | <i>Clostridium sporogenes</i>                   | 1  | CSUR      | - | - |
|                                                     | <i>Clostridium subterminale</i>                 | 1  | CSUR      | - | - |
|                                                     | <i>Clostridium symbosium</i>                    | 1  | CSUR      | - | - |
|                                                     | <i>Clostridium tertium</i>                      | 4  | CSUR      | - | - |
|                                                     | <i>Clostridium tetani</i>                       | 1  | CSUR      | - | - |
| <b><i>Clostridium</i> spp. from this study</b>      | <i>P. sordellii</i>                             | 90 | Tlemcen   | - | - |
|                                                     | <i>Clostridium tertium</i>                      | 3  | Tlemcen   | - | - |
|                                                     | <i>Clostridium perfringens</i>                  | 2  | Tlemcen   | - | - |
|                                                     | <i>Clostridium irregulare</i>                   | 2  | Tlemcen   | - | - |
|                                                     | <i>Clostridium sporogenes</i>                   | 2  | Tlemcen   | - | - |
|                                                     | <i>Clostridium botulinum</i>                    | 1  | Tlemcen   | - | - |
| <b>Total of strains = 237</b>                       |                                                 |    |           |   |   |
| <b>Reference strains</b>                            | <i>Paeniclostridium sordellii</i> (TcsL + TcsH) | 1  | VPI 9048  | + | + |
|                                                     | <i>Paeniclostridium sordellii</i> (TcsL)        | 1  | ATCC 9714 | + | - |
| <b>Total of strains = 2</b>                         |                                                 |    |           |   |   |

CSUR : Collection de Souches de l'Unité des Rickettsies. ATCC: American Type Culture Collection.
